# Supplementary material
Source: PubMed Central journal article supplement (PMC1456935)
Supplement: 7601077s1.pdf [file 7601077s1.pdf]

**A**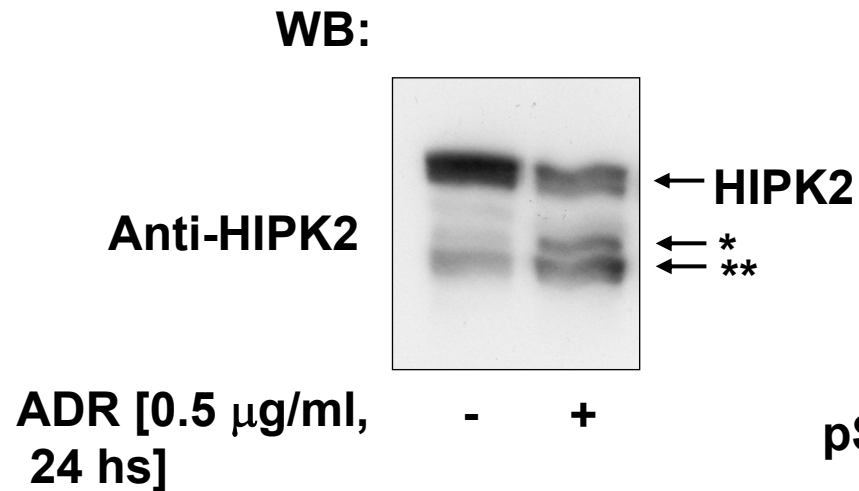**B**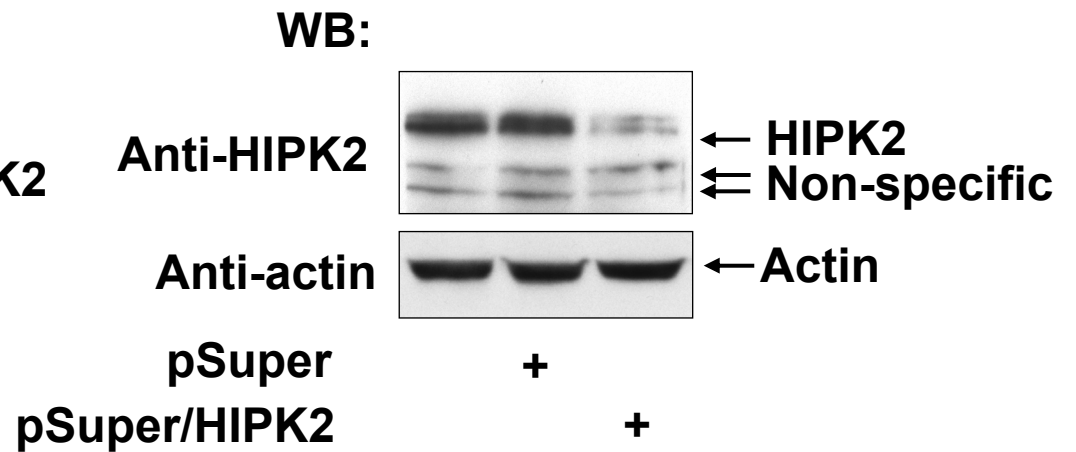

A) For the detection of the HIPK2\* and HIPK2\*\* fragments, U2OS cells were treated with adriamycin as indicated and cell lysates were subsequently analyzed by immunoblotting. Note that there are additional bands recognized by  $\alpha$ HIPK2 antibody in the lysate from untreated cells.

B) U2OS cells were transfected with a vector directing the synthesis of a siRNA interfering with HIPK2 expression (pSUPER/HIPK2) or with the empty pSUPER vector along with a vector encoding resistance to puromycin. After selection of puromycin resistant cells, extracts were prepared and tested for the occurrence of HIPK2 and Actin as a loading control. Please note that the HIPK2 band is significantly reduced while the nonspecific bands remain unchanged. These unspecific bands migrate almost identical to the HIPK2\* and HIPK2\*\* fragments.
