# Supplementary material
Source: PubMed Central journal article supplement (PMC1456935)
Supplement: 7601077s2.pdf [file 7601077s2.pdf]

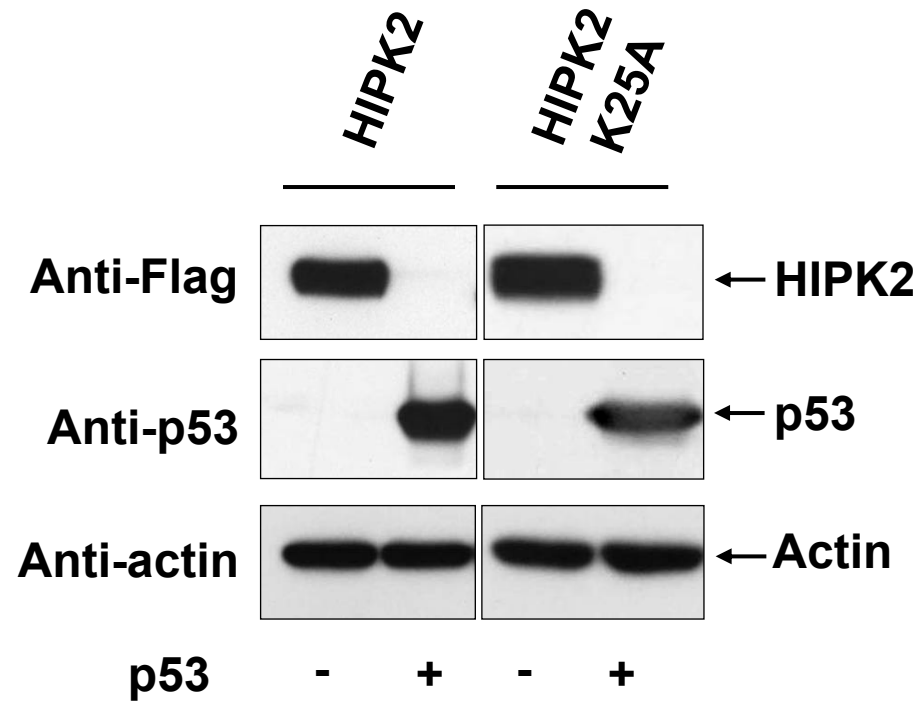

Flag-HIPK2 or the HIPK2 K25A mutant were expressed in H1299 cells in the absence or presence of p53. Cell lysates were analyzed by immunoblotting with the indicated antibodies.
