# Supplementary material
Source: PubMed Central journal article supplement (PMC1456935)
Supplement: 7601077s3.pdf [file 7601077s3.pdf]

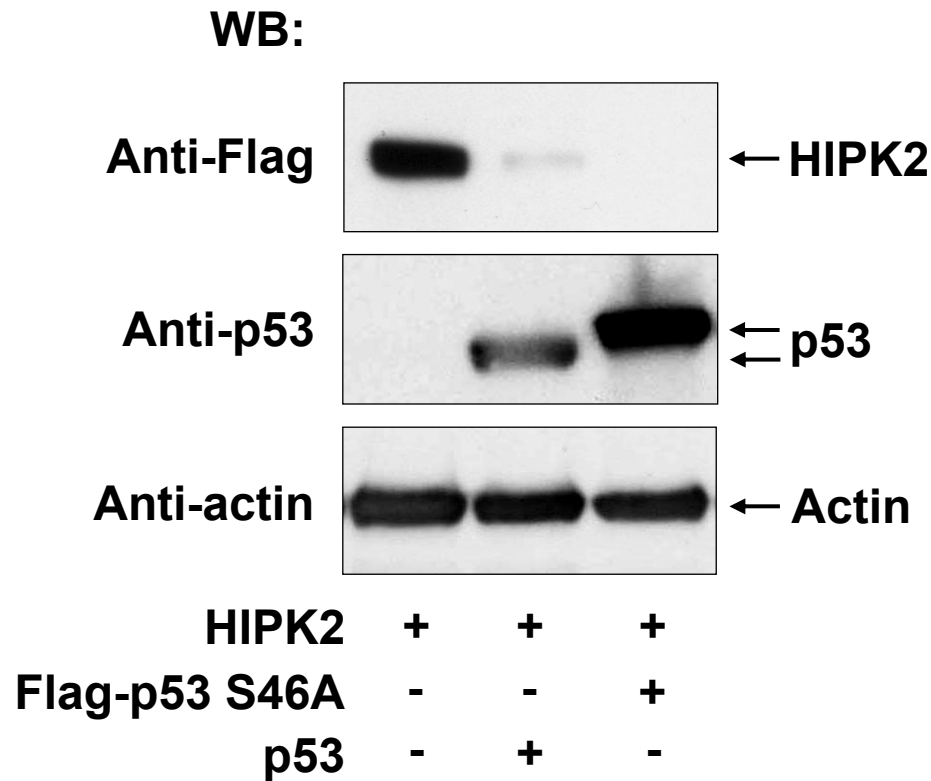

Constant amounts of Flag-HIPK2 were expressed in H1299 cells in the absence or presence of coexpressed p53 or Flag-p53 S46A. Cell lysates were analyzed by immunoblotting with appropriate antibodies for the occurrence of HIPK2 and p53, note that the Flag epitope causes a slight upshift for p53 S46A.
