# Supplementary material
Source: PubMed Central journal article supplement (PMC1456935)
Supplement: 7601077s4.pdf [file 7601077s4.pdf]

-- VIPDTPSPTVSVITISSDTDEEEEQKHAPTSTVSKQRKNVISCVTVHD 916  
 SPYSDSSSNTSPYSVQQRAGHNNANAFDTKGSLENHCTGNPRTIIVPP  
 LKTQASEVLVECSLV--  
 ↑  
 977

Putative caspase cleavage sites within the HIPK2 sequence mediating its degradation. The positions of aspartic acids 977 and 916 are indicated.
