# Supplementary material
Source: PubMed Central journal article supplement (PMC1456935)
Supplement: 7601077s5.pdf [file 7601077s5.pdf]

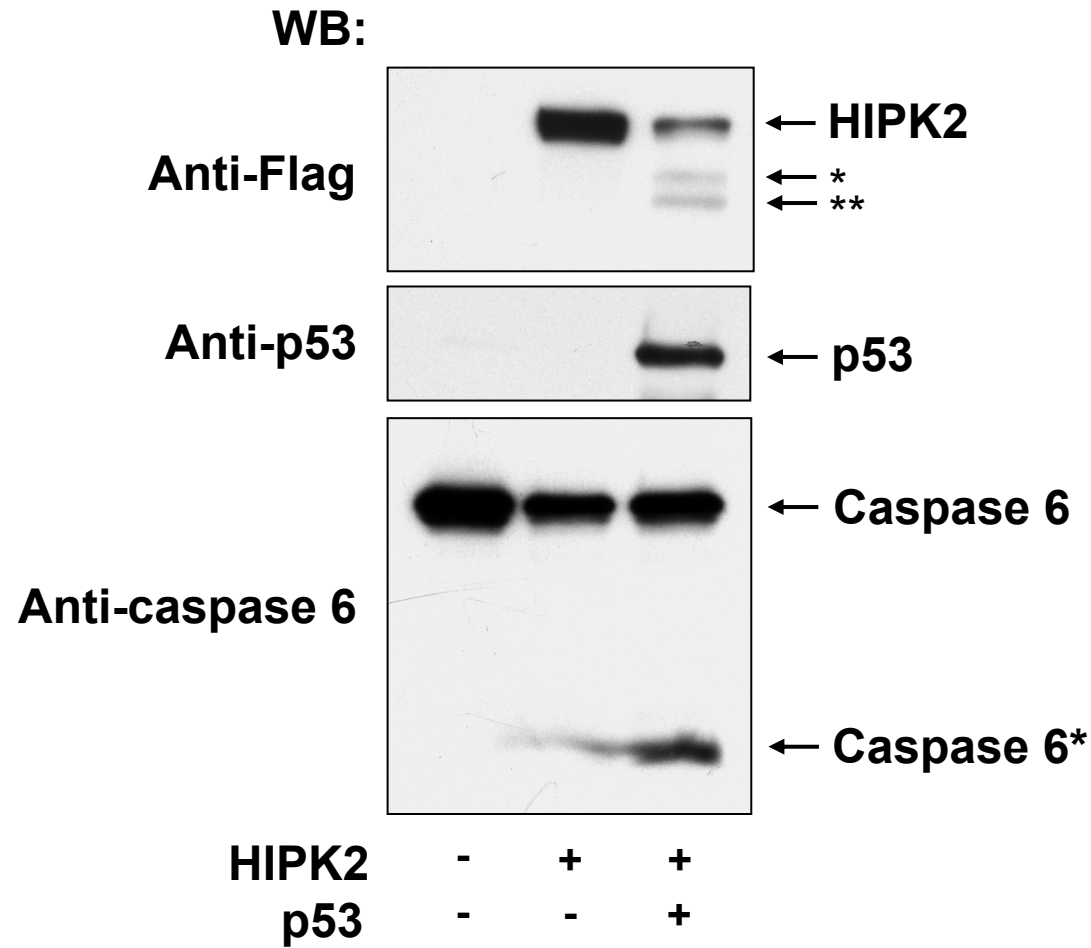

H1299 cells transfected to express HIPK2 alone or in combination with p53 were analyzed by immunoblotting for caspase-6 and the indicated proteins.
