# Supplementary material
Source: PubMed Central journal article supplement (PMC1456935)
Supplement: 7601077s6.pdf [file 7601077s6.pdf]

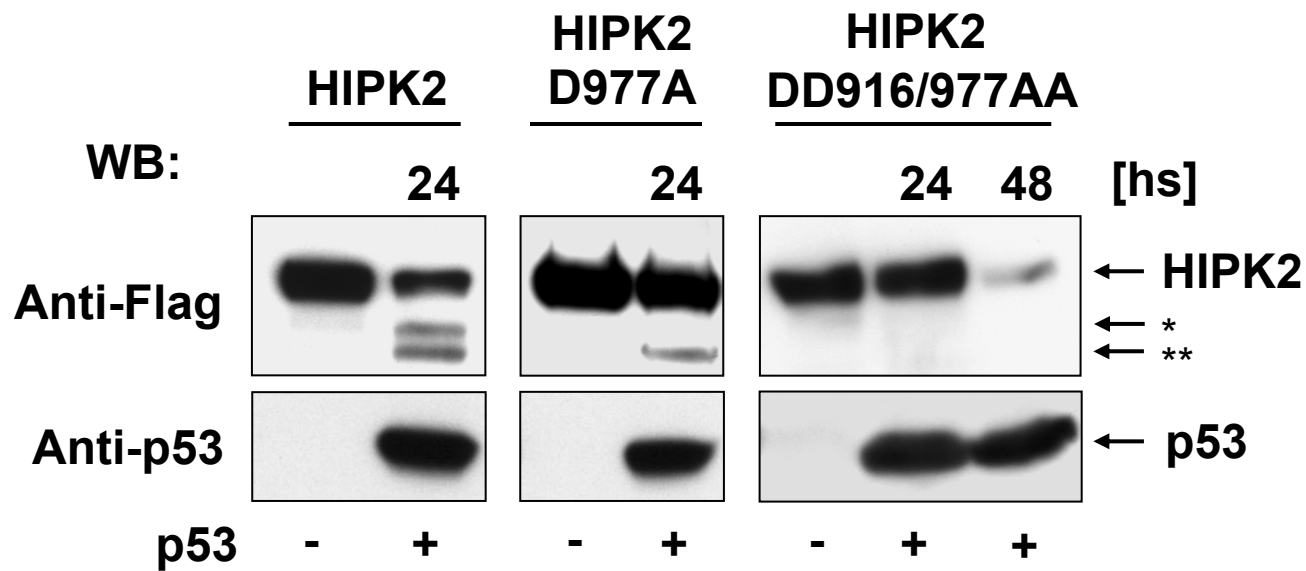

HIPK2 or the HIPK2 D977A and HIPK2 DD916/977AA mutants were expressed for the indicated periods either alone or together with p53 in H1299 cells, followed by the detection of proteins and cleavage products by immunoblotting.
