# Supplementary material
Source: PubMed Central journal article supplement (PMC1456935)
Supplement: 7601077s7.pdf [file 7601077s7.pdf]

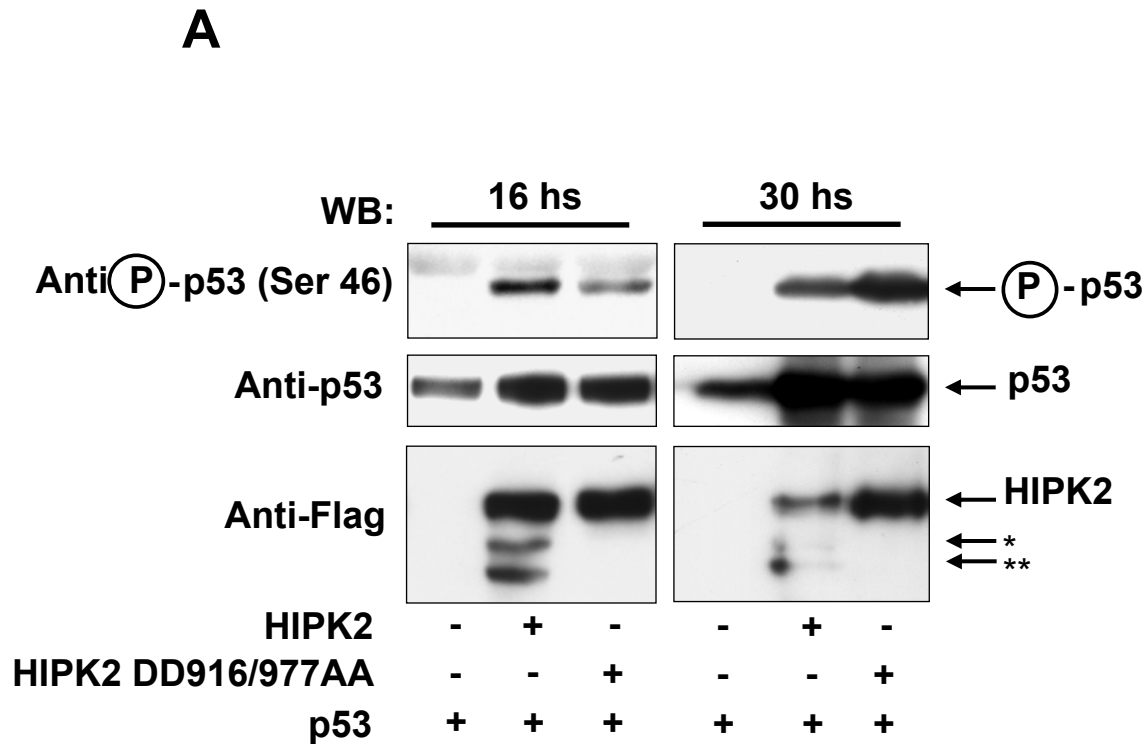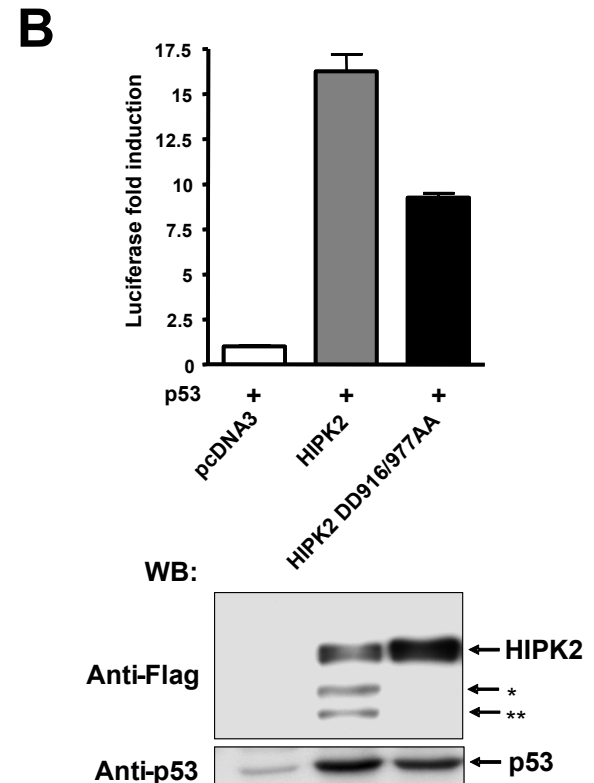

A) H1299 cells were transfected to express p53 in combination with HIPK2 or noncleavable HIPK2 DD916/977AA as shown. Cells were harvested after 16 and 30 hs, followed by the analysis of p53 serine 46 phosphorylation and expression of p53 or HIPK2.

B) H1299 cells were transfected with a luciferase reporter gene controlled by the human bax promoter, and the indicated combinations of p53, HIPK2 or HIPK2 DD916/977A. Upper: Luciferase activity was analyzed 16 hs after transfection, gene induction by p53 alone was arbitrarily set as 1. Lower: Cell extracts were analyzed for the occurrence of p53 and HIPK2 as shown.
