# Supplementary material
Source: PubMed Central journal article supplement (PMC1456935)
Supplement: 7601077s8.pdf [file 7601077s8.pdf]

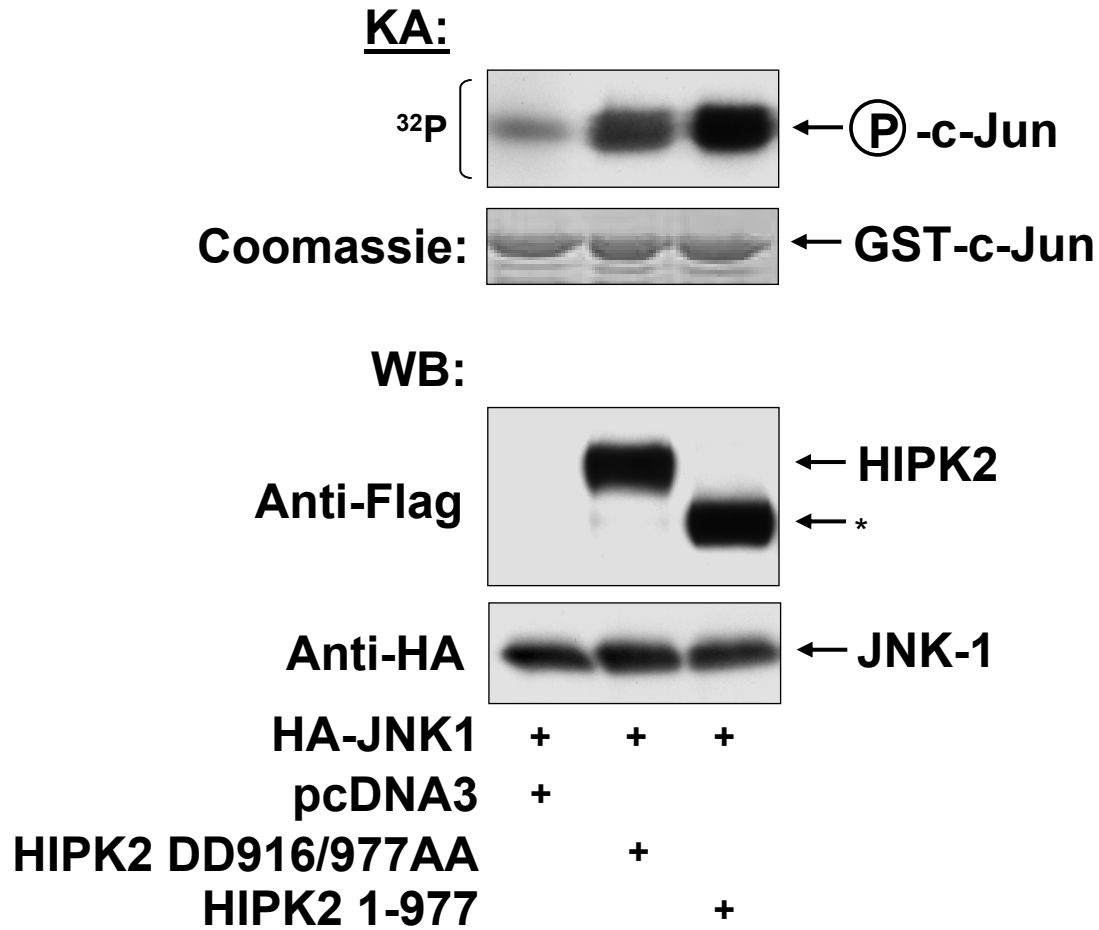

293T cells expressing the indicated combinations of HA-JNK1, HIPK2 DD916/977AA or HIPK2 1-977 were lysed. HA-JNK1 was immunoprecipitated from one aliquot of the extract, followed by the in vitro kinase assay (KA) using recombinant and purified GST-c-Jun as a substrate in the presence of  $\gamma$ -<sup>32</sup>P-ATP. An autoradiogram is shown. The lower part shows a Western blot (WB) ensuring correct expression of JNK and HIPK2 proteins.
